# Supplementary material
Source: PubMed Central journal article supplement (PMC9985654)
Supplement: 41541_2023_629_MOESM1_ESM.pdf [file 41541_2023_629_MOESM1_ESM.pdf]

# SUPPLEMENTARY INFORMATION

a

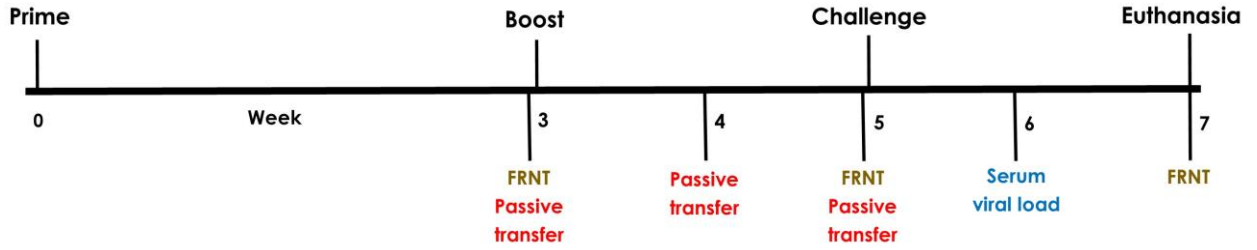

b

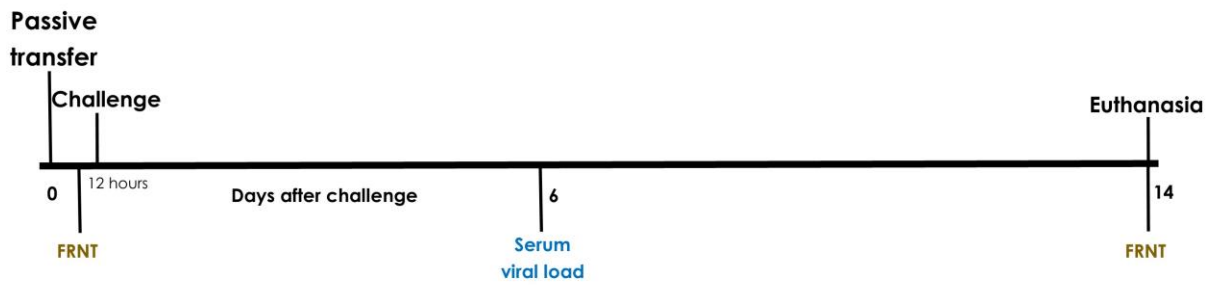

c

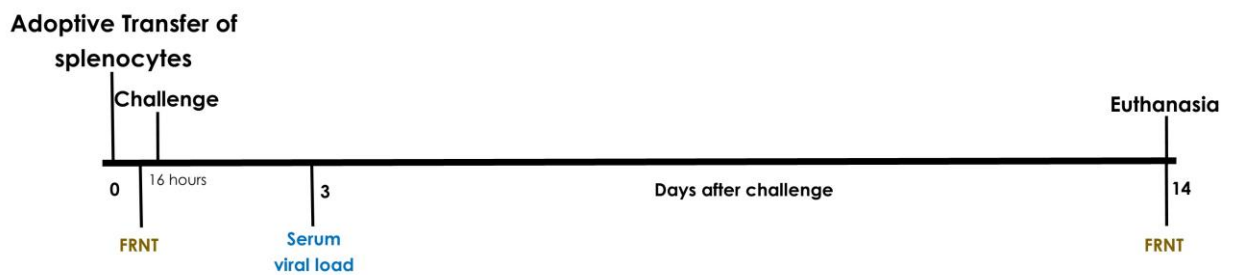

d

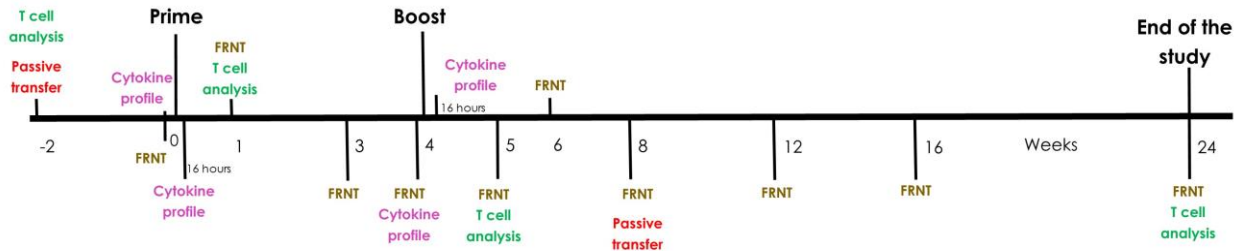

e

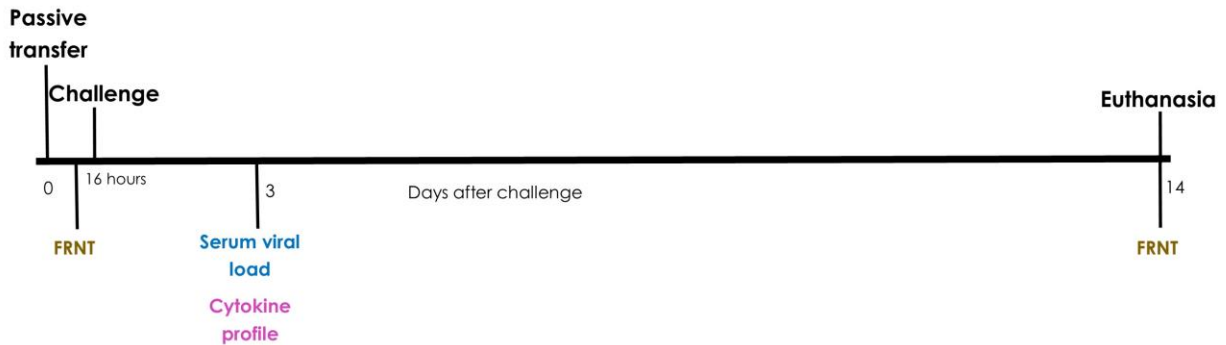

**Supplementary figure 1. Animal treatment schedule and sample collection.** (a) In mouse vaccination studies, mice received two immunizations via IM injection 3 weeks apart (day 0, 21), except for 2.5 prM-E/NS1 and YFV-17D vaccine groups which received a single immunization on day 0. All mice were challenged in week 5 (day 35) and sera were obtained after 3, 4, 5, 6, and 7 (end of the study) weeks. (b) For passive transfer studies, mice received 200  $\mu$ L of serum via IP injection and were bled and challenged after 12 h. Additional serum samples were taken on days 6 and 14 after challenge (end of the study). (c) For adoptive transfer of splenocytes, mice received  $1 \times 10^7$  splenocytes from vaccinated or placebo mice via retro-orbital injection. Recipient mice were bled and challenged after 16 h. Mice were bled on days 3 and 14 (end of the study). (d) Macaques received two doses of mRNA-LNP vaccines 4 weeks apart (days 0, 28) via IM injection or a single dose of YFV-17D vaccine on day 0. Serum samples were obtained in weeks -2 and 0 (before study start), 16 h after each vaccination (d1 or d29) and in weeks 1, 3, 4, 5, 6, 8, 12, 16, and 24 (end of the study). PBMCs were obtained in weeks -2, 1, 5, and 24. (e) For passive transfer of sera from macaques into A129 mice, NHP serum samples from week -2 (naïve) or week 8 (vaccinated) were used. Mice received 200  $\mu$ L of serum via IP injection and were bled and challenged after 16 h. Additional blood samples were taken from infected mice on days 3 and 14 (end of the study).

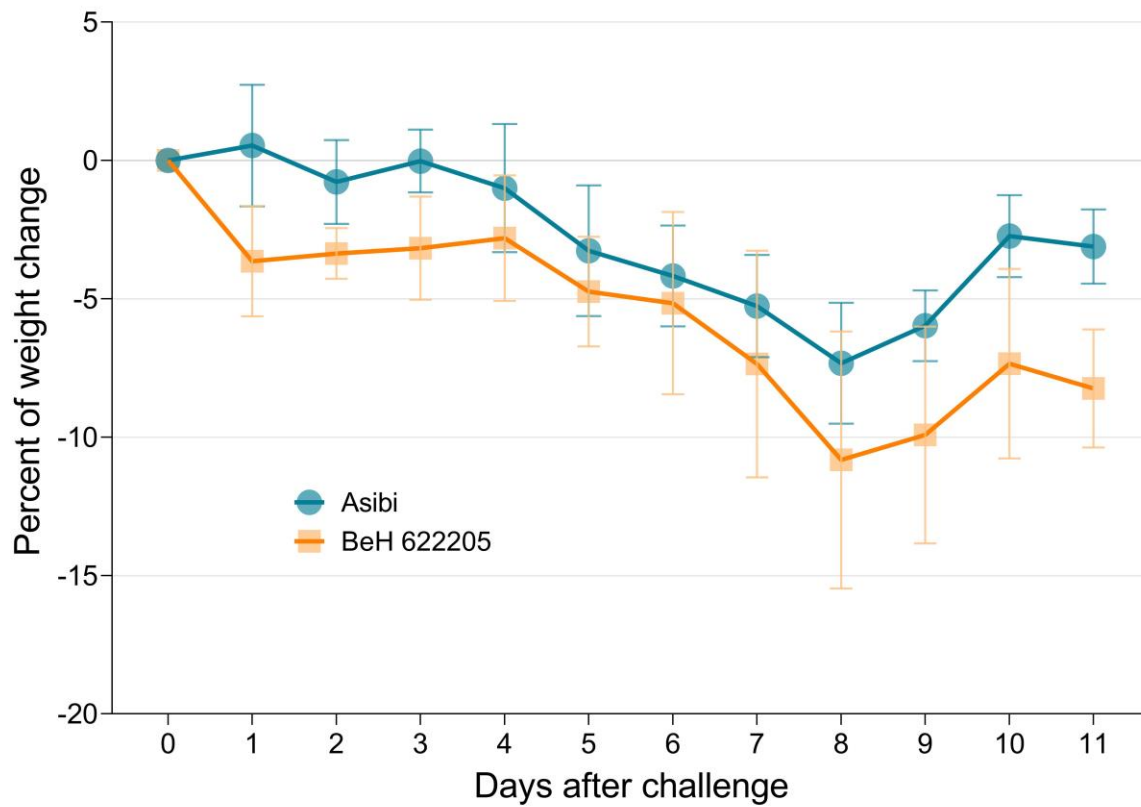

**Supplementary figure 2. Pathogenicity of wtYFV strains in adult A129 mice.** Eight to eleven weeks old A129 mice were infected via IM injection with  $1 \times 10^4$  PFU of YFV Asibi ( $n=3$ ) or BeH 622205 ( $n=5$ ) strains. The graph shows the percentage of the body weight change ( $\pm$  SD) of the animals over a period of 11 days post-challenge.
